# Supplementary material for: Outbreak of Uncommon O4 Non-Agglutinating Salmonella Typhimurium Linked to Minced Pork, Saxony-Anhalt, Germany, January to April 2013
Source: PLoS One. 2015 Jun 1;10(6):e0128349. doi: 10.1371/journal.pone.0128349 (PMC4452650; doi:10.1371/journal.pone.0128349)
Supplement: S1 Table — (XLS) [file pone.0128349.s001.xls]

## Sheet: O4 non-agglutinating STM
ID	Case	Human/Food	Sex	Age	Federal State	Phage Type	O4 antigen agglutination	H2 antigen agglutination	O1 antigen agglutination	O12 antigen agglutination	Hi antigen agglutination	H1,2 antigen agglutination	FliA-B	18,4kb GI	fljB	PFGE type	MLVA type	Resistance phenotype	ASSuT/ACSSuT phenotype	Cm-r phenotype
1	0	Human	female	5	NW	DT193	-	-	-	+	+	-	ca.1000bp	+	-	40	3-14-9-NA-0211	AMP, MEZ, OTE, SMZ, STR	ASSuT	0
2	0	Human	male	15	NW	DT193	-	-	-	+	+	-	ca.1000bp	+	-	40	3-14-9-NA-0211	AMP, MEZ, OTE, SMZ, STR	ASSuT	0
3	1	Human	male	77	ST	DT193	-	-	-	+	+	-	ca.1000bp	+	-	5	3-14-10-NA-0211	AMP, CMP, MEZ, NAL, OTE, SMZ, STR	other	1
4	1	Human	female	84	ST	DT193	-	-	-	+	+	-	ca.1000bp	+	-	not typed	3-14-8-NA-0211	AMP, CMP, MEZ, NAL, OTE, SMZ, STR	other	1
5	1	Human	male	5	ST	DT193	-	-	-	+	+	-	ca.1000bp	+	-	5	3-14-10-NA-0211	AMP, CMP, MEZ, NAL, OTE, SMZ, STR	other	1
6	1	Human	female	3	ST	DT193	-	-	-	+	+	-	ca.1000bp	+	-	5	3-14-10-NA-0211	AMP, CMP, MEZ, NAL, OTE, SMZ, STR	other	1
7	1	Human	female	20	ST	DT193	-	-	-	+	+	-	ca.1000bp	+	-	5	3-14-8-NA-0211	AMP, CMP, MEZ, OTE, SMZ, STR	ACSSuT	1
8	1	Human	female	61	ST	DT193	-	-	-	+	+	-	ca.1000bp	+	-	not typed	3-14-10-NA-0211	AMP, CMP, MEZ, OTE, SMZ, STR	ACSSuT	1
9	1	Human	female	76	ST	DT193	-	-	-	+	+	-	ca.1000bp	+	-	not typed	3-14-10-NA-0211	AMP, CMP, MEZ, OTE, SMZ, STR	ACSSuT	1
10	1	Human	female	73	TH	DT193	-	-	-	+	+	-	ca.1000bp	+	-	5	3-14-8-NA-0211	AMP, CMP, MEZ, MSU, NAL, OTE, SMZ, STR	other	1
11	1	Human	female	28	TH	DT193	-	-	-	+	+	-	ca.1000bp	+	-	5	3-14-8-NA-0211	AMP, CMP, MEZ, OTE, SMZ, STR	ACSSuT	1
12	1	Human	male	3	ST	DT193	-	-	-	+	+	-	ca.1000bp	+	-	not typed	3-14-10-NA-0211	AMP, CMP, MEZ, OTE, SMZ, STR	ACSSuT	1
13	1	Human	male	29	ST	DT193	-	-	-	+	+	-	ca.1000bp	+	-	5	3-14-10-NA-0211	AMP, CMP, MEZ, OTE, SMZ, STR	ACSSuT	1
14	1	Human	male	11	ST	DT193	-	-	-	+	+	-	ca.1000bp	+	-	5	3-14-10-NA-0211	AMP, CMP, MEZ, OTE, SMZ, STR	ACSSuT	1
15	1	Human	male	63	ST	DT193	-	-	-	+	+	-	ca.1000bp	+	-	5	3-15-10-NA-0211	AMP, CMP, MEZ, OTE, SMZ, STR	ACSSuT	1
16	1	Human	male	70	ST	DT193	-	-	-	+	+	-	ca.1000bp	+	-	5	3-13-10-NA-0211	AMP, CMP, MEZ, OTE, SMZ, STR	ACSSuT	1
17	1	Human	male	3	ST	DT193	-	-	-	+	+	-	ca.1000bp	+	-	not typed	3-14-8-NA-0211	AMP, CMP, MEZ, OTE, SMZ, STR	ACSSuT	1
18	1	Human	male	22	ST	DT193	-	-	-	+	+	-	ca.1000bp	+	-	not typed	3-14-10-NA-0211	AMP, CMP, MEZ, NAL, OTE, SMZ, STR	other	1
19	1	Human	male	73	ST	DT193	-	-	-	+	+	-	ca.1000bp	+	-	5	3-14-10-NA-0211	AMP, CMP, MEZ, OTE, SMZ, STR	ACSSuT	1
20	1	Human	male	75	ST	DT193	-	-	-	+	+	-	ca.1000bp	+	-	5	3-14-10-NA-0211	AMP, CMP, MEZ, OTE, SMZ, STR	ACSSuT	1
21	1	Human	male	18	LS	DT193	-	-	-	+	+	-	ca.1000bp	+	-	5	3-14-10-NA-0211	AMP, MEZ, OTE, SMZ, STR	ASSuT	0
22	1	Human	female	11	ST	DT193	-	-	-	+	+	-	ca.1000bp	+	-	not typed	3-14-10-NA-0211	AMP, MEZ, MSU, OTE, SMZ, STR	other	0
23	1	Human	male	75	ST	DT193	-	-	-	+	+	-	ca.1000bp	+	-	5	3-14-10-NA-0211	AMP, MEZ, OTE, SMZ, STR	ASSuT	0
24	1	Human	male	67	ST	DT193	-	-	-	+	+	-	ca.1000bp	+	-	not typed	3-14-10-NA-0211	AMP, CMP, MEZ, NAL, OTE, SMZ, STR	other	1
25	1	Human	female	85	ST	DT193	-	-	-	+	+	-	ca.1000bp	+	-	not typed	3-14-10-NA-0211	AMP, COX, CTM, MEZ, MSU, OTE, SMZ, STR	other	0
26	1	Human	female	3	ST	DT193	-	-	-	+	+	-	ca.1000bp	+	-	5	3-14-10-NA-0211	AMP, MEZ, OTE, SMZ, STR	ASSuT	0
27	1	Human	male	78	ST	DT193	-	-	-	+	+	-	ca.1000bp	+	-	5h	3-14-8-NA-0211	AMP, MEZ, MSU, OTE, SMZ, STR, SXT	other	0
28	1	Human	female	45	ST	DT193	-	-	-	+	+	-	ca.1000bp	+	-	not typed	3-14-8-NA-0211	AMP, MEZ, OTE, SMZ, STR	ASSuT	0
29	1	Human	female	75	ST	DT193	-	-	-	+	+	-	ca.1000bp	+	-	not typed	3-14-10-NA-0211	AMP, MEZ, OTE, SMZ, STR	ASSuT	0
30	1	Human	female	78	ST	DT193	-	-	-	+	+	-	ca.1000bp	+	-	5	3-14-10-NA-0211	AMP, CMP, MEZ, OTE, SMZ, STR	ACSSuT	1
31	1	Human	female	46	ST	DT193	-	-	-	+	+	-	ca.1000bp	+	-	not typed	3-14-8-NA-0211	AMP, MEZ, OTE, SMZ, STR	ASSuT	0
32	1	Human	male	42	ST	DT193	-	-	-	+	+	-	ca.1000bp	+	-	not typed	3-14-8-NA-0211	AMP, MEZ, OTE, SMZ, STR	ASSuT	0
33	1	Human	female	2	ST	DT193	-	-	-	+	+	-	ca.1000bp	+	-	not typed	3-14-10-NA-0211	AMP, MEZ, OTE, SMZ, STR	ASSuT	0
34	1	Human	female	28	ST	DT193	-	-	-	+	+	-	ca.1000bp	+	-	not typed	3-14-10-NA-0211	AMP, MEZ, MSU, OTE, SMZ, STR	other	0
35	1	Human	female	74	ST	DT193	-	-	-	+	+	-	ca.1000bp	+	-	not typed	3-14-10-NA-0211	AMP, MEZ, OTE, SMZ, STR	ASSuT	0
36	1	Human	male	2	ST	DT193	-	-	-	+	+	-	ca.1000bp	+	-	5	3-14-8-NA-0211	AMP, CMP, MEZ, OTE, SMZ, STR	ACSSuT	1
37	1	Human	female	81	ST	DT193	-	-	-	+	+	-	ca.1000bp	+	-	5	3-14-10-NA-0211	AMP, CMP, MEZ, OTE, SMZ, STR	ACSSuT	1
38	1	Human	female	40	ST	DT193	-	-	-	+	+	-	ca.1000bp	+	-	5	3-14-10-NA-0211	AMP, MEZ, OTE, SMZ, STR	ASSuT	0
39	1	Human	male	75	ST	DT193	-	-	-	+	+	-	ca.1000bp	+	-	not typed	3-14-8-NA-0211	AMP, MEZ, OTE, SMZ, STR	ASSuT	0
40	1	Human	female	60	ST	DT193	-	-	-	+	+	-	ca.1000bp	+	-	not typed	3-14-10-NA-0211	AMP, MEZ, OTE, SMZ, STR	ASSuT	0
41	1	Human	male	21	SN	DT193	-	-	-	+	+	-	ca.1000bp	+	-	5	3-14-10-NA-0211	AMP, CMP, MEZ, OTE, SMZ, STR	ACSSuT	1
42	1	Human	male	56	ST	DT193	-	-	-	+	+	-	ca.1000bp	+	-	5	3-14-10-NA-0211	AMP, CMP, MEZ, OTE, SMZ, STR	ACSSuT	1
43	0	Human	male	27	NW	DT193	-	-	-	+	+	-	ca.1000bp	+	-	40	3-14-9-NA-0211	AMP, MEZ, OTE, SMZ, STR	ASSuT	0
44	1	Human	female	2	ST	DT193	-	-	-	+	+	-	ca.1000bp	+	-	not typed	3-14-10-NA-0211	AMP, MEZ, OTE, SMZ, STR	ASSuT	0
45	1	Human	male	31	ST	DT193	-	-	-	+	+	-	ca.1000bp	+	-	not typed	3-14-10-NA-0211	AMP, CMP, COX, MEZ, OTE, SMZ, STR	other	1
46	not applicable	Food	not applicable	not applicable	not applicable	DT193	-	-	-	+	+	-	ca.1000bp	+	-	5	3-14-10-NA-0211	AMP, CMP, MEZ, OTE, SMZ, STR	ACSSuT	1
47	1	Human	male	81	ST	DT193	-	-	-	+	+	-	ca.1000bp	+	-	not typed	3-14-8-NA-0211	AMP, CMP, MEZ, OTE, SMZ, STR	ACSSuT	1
48	1	Human	male	53	ST	DT193	-	-	-	+	+	-	ca.1000bp	+	-	5	3-14-8-NA-0211	AMP, CMP, MEZ, OTE, SMZ, STR	ACSSuT	1
49	0	Human	male	19	NW	DT193	-	-	-	+	+	-	ca.1000bp	+	-	40	3-14-9-NA-0211	AMP, MEZ, OTE, SMZ, STR	ASSuT	0
50	1	Human	male	77	ST	DT193	-	-	-	+	+	-	ca.1000bp	+	-	not typed	3-14-10-NA-0211	AMP, CMP, MEZ, OTE, SMZ, STR	ACSSuT	1
51	1	Human	male	91	ST	DT193	-	-	-	+	+	-	ca.1000bp	+	-	not typed	3-14-10-NA-0211	AMP, CMP, COX, MEZ, OTE, SMZ, STR	other	1
52	1	Human	female	4	ST	DT193	-	-	-	+	+	-	ca.1000bp	+	-	5	3-14-10-NA-0211	AMP, MEZ, OTE, SMZ, STR	ASSuT	0
53	1	Human	male	10	ST	DT193	-	-	-	+	+	-	ca.1000bp	+	-	not typed	3-14-8-NA-0211	AMP, MEZ, OTE, SMZ, STR	ASSuT	0
54	1	Human	male	11	ST	DT193	-	-	-	+	+	-	ca.1000bp	+	-	not typed	3-14-10-NA-0211	AMP, MEZ, MSU, OTE, SMZ, STR	other	0
55	1	Human	male	72	ST	DT193	-	-	-	+	+	-	ca.1000bp	+	-	5a	3-14-9-NA-0211	AMP, MEZ, MSU, OTE, SMZ, STR	other	0
56	not applicable	Food	not applicable	not applicable	not applicable	DT193	-	-	-	+	+	-	ca.1000bp	+	-	5	3-14-10-NA-0211	AMP, CMP, MEZ, OTE, SMZ, STR	ACSSuT	1
57	not applicable	Food	not applicable	not applicable	not applicable	DT193	-	-	-	+	+	-	ca.1000bp	+	-	5	3-14-10-NA-0211	AMP, CMP, MEZ, OTE, SMZ, STR	ACSSuT	1
58	1	Human	male	54	ST	DT193	-	-	-	+	+	-	ca.1000bp	+	-	5	3-14-10-NA-0211	AMP, CMP, MEZ, OTE, SMZ, STR	ACSSuT	1
59	0	Human	female	18	NW	DT193	-	-	-	+	+	-	ca.1000bp	+	-	40e	3-14-10-NA-0211	AMP, MEZ, SMZ, STR	other	0
60	0	Human	male	52	BW	DT193	-	-	-	+	+	-	ca.1000bp	+	-	40	3-14-9-NA-0211	AMP, MEZ, OTE, SMZ, STR	ASSuT	0
61	1	Human	female	88	ST	DT193	-	-	-	+	+	-	ca.1000bp	+	-	not typed	3-14-10-NA-0211	AMP, CMP, MEZ, OTE, SMZ, STR	ACSSuT	1
62	1	Human	female	90	ST	DT193	-	-	-	+	+	-	ca.1000bp	+	-	5	3-14-10-NA-0211	AMP, MEZ, OTE, SMZ, STR	ASSuT	0
63	1	Human	male	not available	HE	DT193	-	-	-	+	+	-	ca.1000bp	+	-	5	3-14-10-NA-0211	AMP, MEZ, OTE, SMZ, STR	ASSuT	0
64	1	Human	female	19	ST	DT193	-	-	-	+	+	-	ca.1000bp	+	-	5	3-14-10-NA-0211	AMP, CMP, MEZ, OTE, SMZ, STR	ACSSuT	1
65	1	Human	male	81	ST	DT194	-	-	-	+	+	-	ca.1000bp	+	-	5	3-14-10-NA-0211	AMP, MEZ, OTE, SMZ, STR	ASSuT	0
66	1	Human	male	77	ST	DT193	-	-	-	+	+	-	ca.1000bp	+	-	not typed	3-14-10-NA-0211	AMP, MEZ, OTE, SMZ, STR	ASSuT	0
67	1	Human	male	57	ST	DT193	-	-	-	+	+	-	ca.1000bp	+	-	5	3-14-10-NA-0211	AMP, MEZ, MSU, OTE, SMZ, STR	other	0
68	1	Human	female	1	ST	DT193	-	-	-	+	+	-	ca.1000bp	+	-	5	3-14-10-NA-0211	AMP, MEZ, OTE, SMZ, STR	ASSuT	0
69	1	Human	female	80	ST	DT193	-	-	-	+	+	-	ca.1000bp	+	-	5	3-14-10-NA-0211	AMP, MEZ, OTE, SMZ, STR	ASSuT	0
70	0	Human	female	79	NI	DT193	-	-	-	+	+	-	ca.1000bp	+	-	51a	3-12-9 -NA-0211	AMP, CMP, MEZ, MSU, OTE, SMZ, STR, SXT	other	1
71	1	Human	male	63	ST	DT193	-	-	-	+	+	-	ca.1000bp	+	-	not typed	3-14-10-NA-0211	AMP, CMP, MEZ, OTE, SMZ, STR	ACSSuT	1
